# Supplementary material for: Female Immunity Protects from Cutaneous Squamous Cell Carcinoma
Source: Oxford University Press journal article supplement (doi:10.1158/1078-0432.ccr-20-4261), 2021-04-01
Supplement: 10780432ccr204261-sup-254690_3_supp_6993025_qq4g2b.docx [file 10780432ccr204261-sup-254690_3_supp_6993025_qq4g2b.docx]

**Supplementary Material**

**Supplementary Figures**

**Supplementary Figure 1**

**
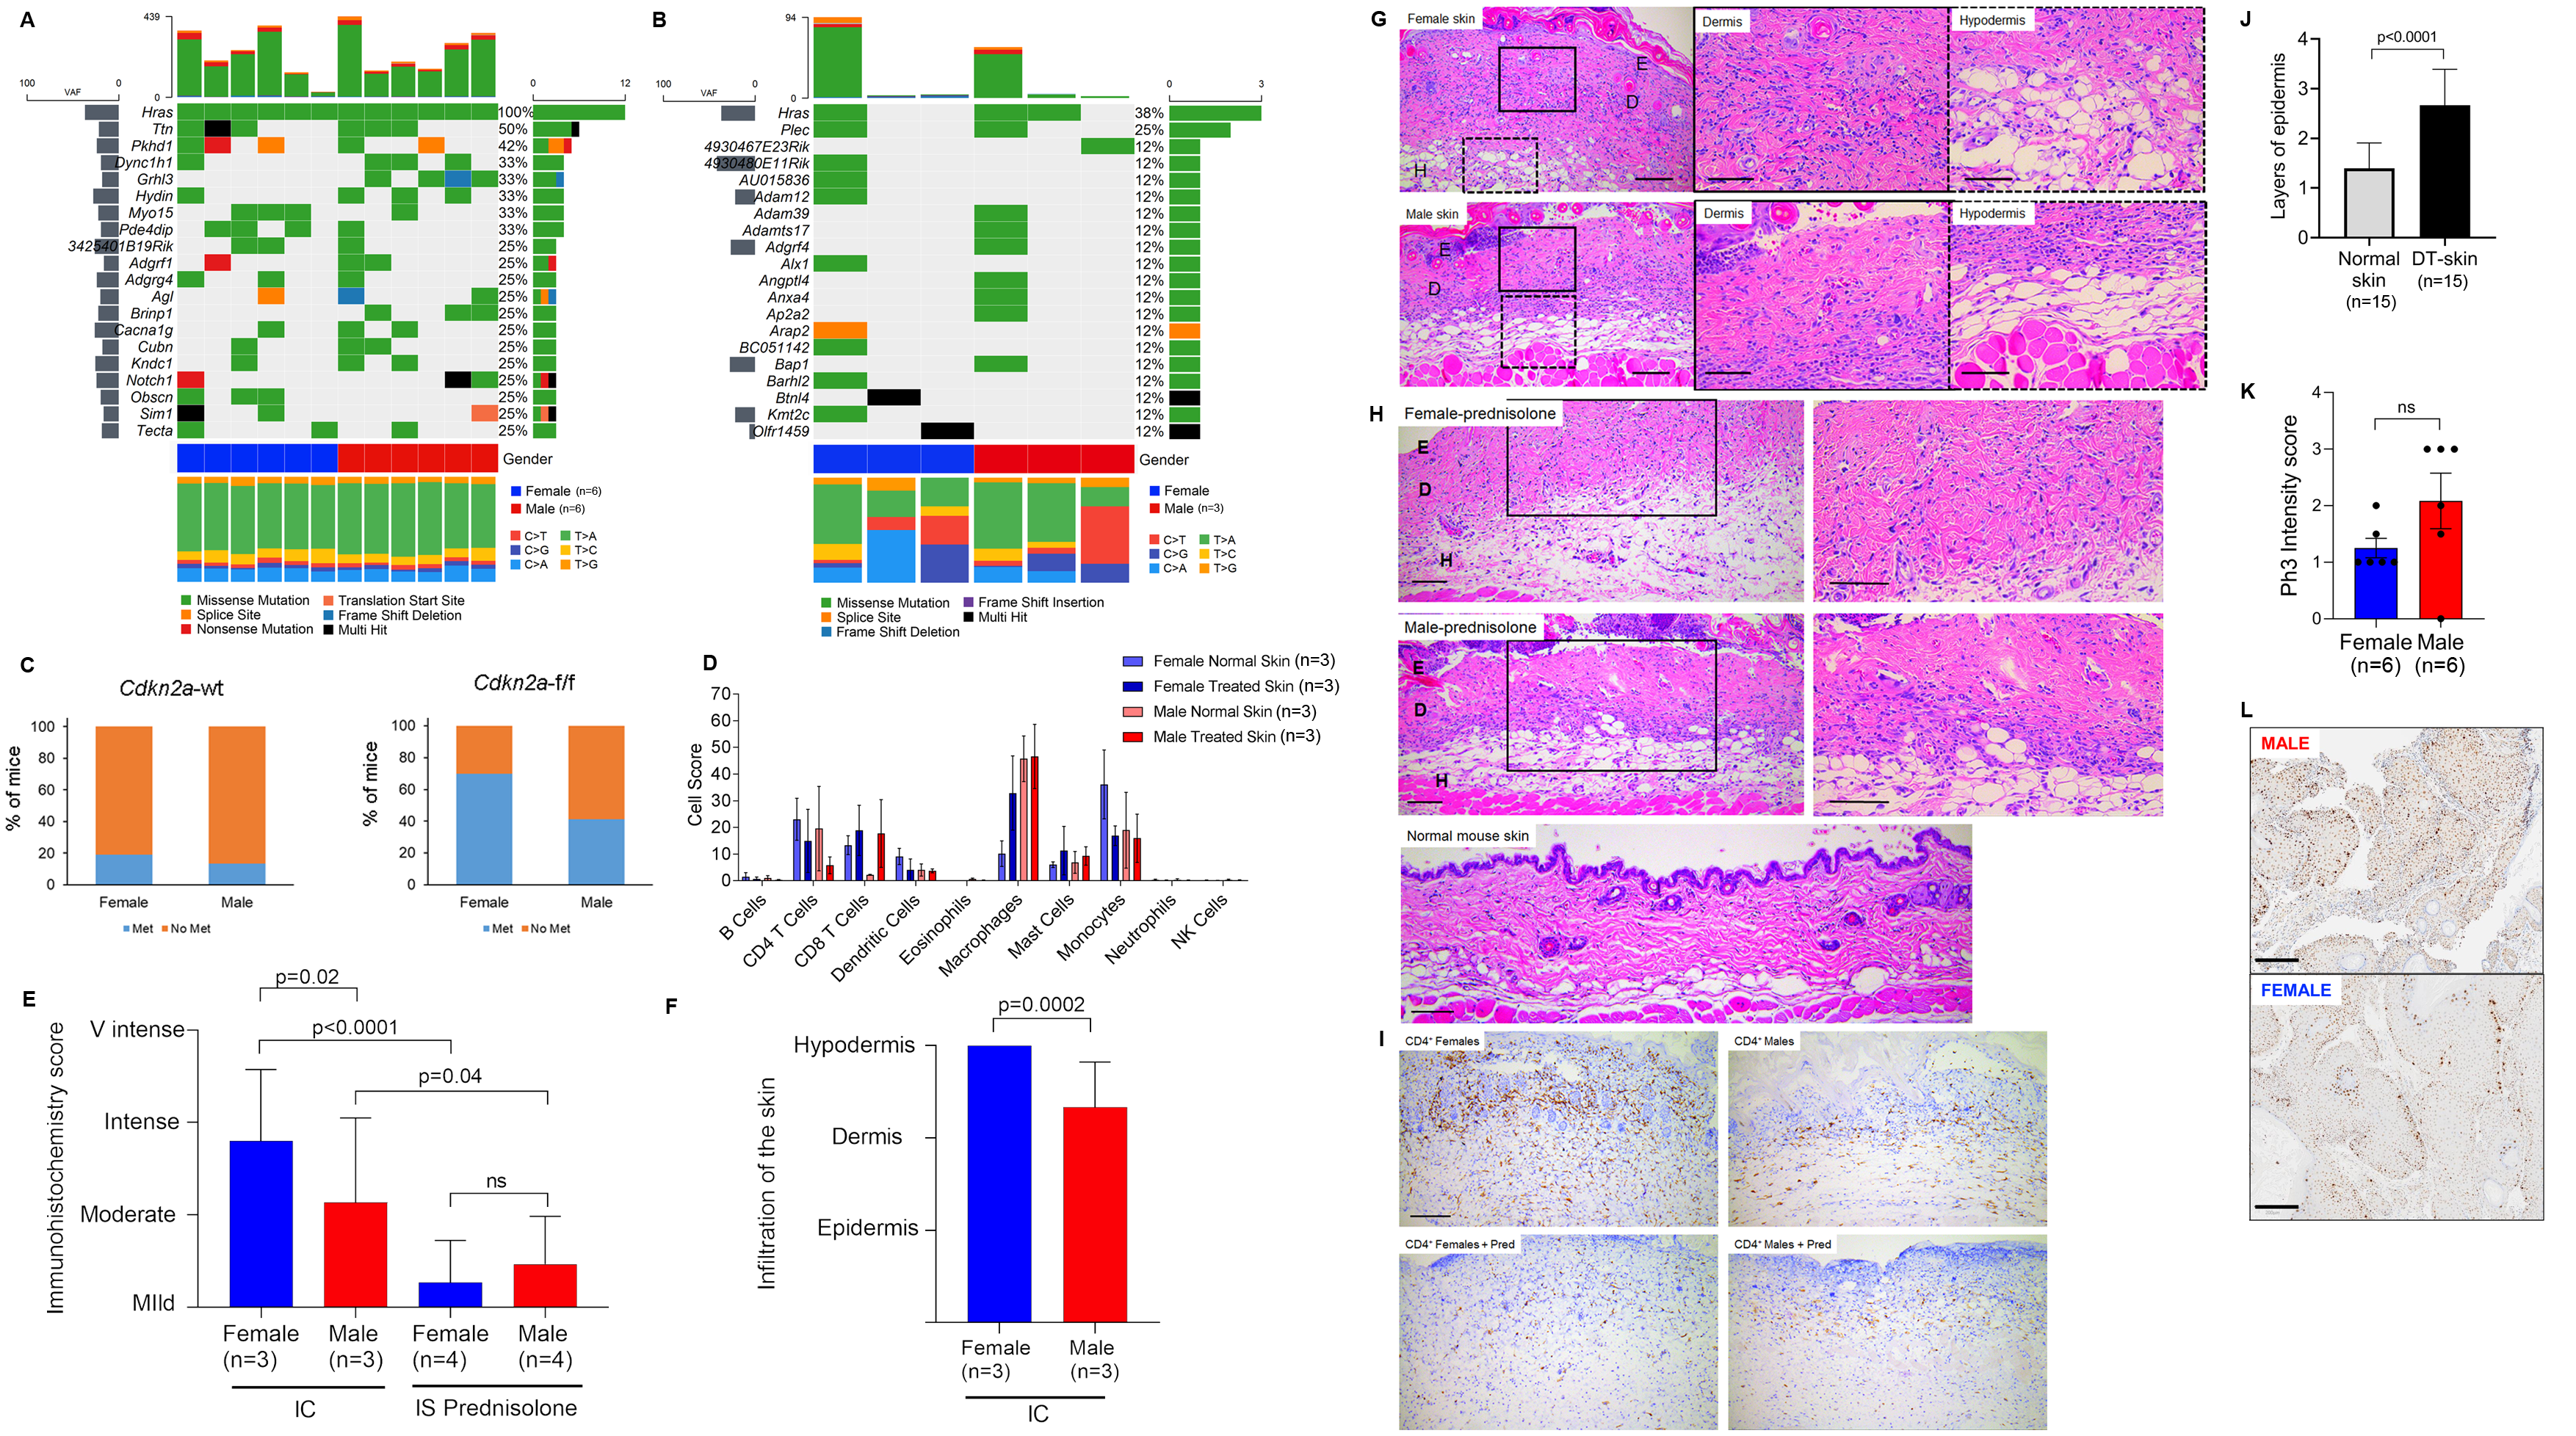
**

**Supplementary Figure 1.**

(A) Oncoplots of 20 most frequently mutated genes by sex in DT-cSCC and (B) DMBA/TPA treated skin (DT-skin). (C) Proportion of *Cdkn2a* wt and *Cdkn2a*fl/fl animals with primary cSCC developing metastatic disease. (D) Immune cell landscape in normal and DMBA/TPA treated skin by sex estimated from RNA-seq data(1), p values not significant Mann Whitney test, (n males = 3 ; females = 3). (E) Layers of the skin densely infiltrated by inflammatory cells by sex following DMBA/TPA in immunocompetent animals. (F) CD4+ cell infiltrate following DMBA/TPA in immunocompetent and prednisolone-treated animals by sex. P values Mann-Whitney. N= 6 IC animals, 8 IS. Scores were done across n=15 fields of skin per condition x100 magnification. (G) Top row: representative images of immunocompetent female skin, revealing intense and dense infiltration of inflammatory cells following DMBA/TPA across the epidermis, dermis and hypodermis. The intensity of the infiltrate affects the normal architecture of the 3 layers. scale bars: left 150 um, middle 75 um, right 75 um. Second row: representative photomicrographs of immunocompetent male skin, revealing more localised tissue infiltration predominating at the deep dermis, respecting the architecture of the hypodermis. scale bars: left 150 um, middle 75 um, right 75 um. (H) First row: representative photomicrographs of immunosuppressed female skin, revealing extensive damage to the skin, with sloughing of the epidermis (E), sparse inflammatory cell infiltrate in the dermis (D, boxed inset) and hypodermis (H). Scale bars 75 um. Second row: representative photomicrographs of immunosuppressed male skin, revealing extensive damage to the skin, with sloughing of the epidermis (E), sparse inflammatory cell infiltrate in the dermis) and hypodermis (D, H, boxed inset). Scale bars 75 um. Third row: representative image of normal mouse skin, scale bar: 75um. (I) Representative images of female and male skin stained with anti-CD4 antibody following DMBA/TPA +/- oral prednisolone, across the epidermis, dermis and hypodermis. The intensity ranges from mild to very intense, scale bar 100 um. (J) Layers of epidermal cells in normal skin and DT-skin. (K) Intensity score of mitotic cells (phospho-H3) by sex in DT-cSCC. (L) Representative images of phospho-H3 staining (brown) in male and female DT-cSCC tumors (scale bar: 200µm).

**Supplementary Figure 2**


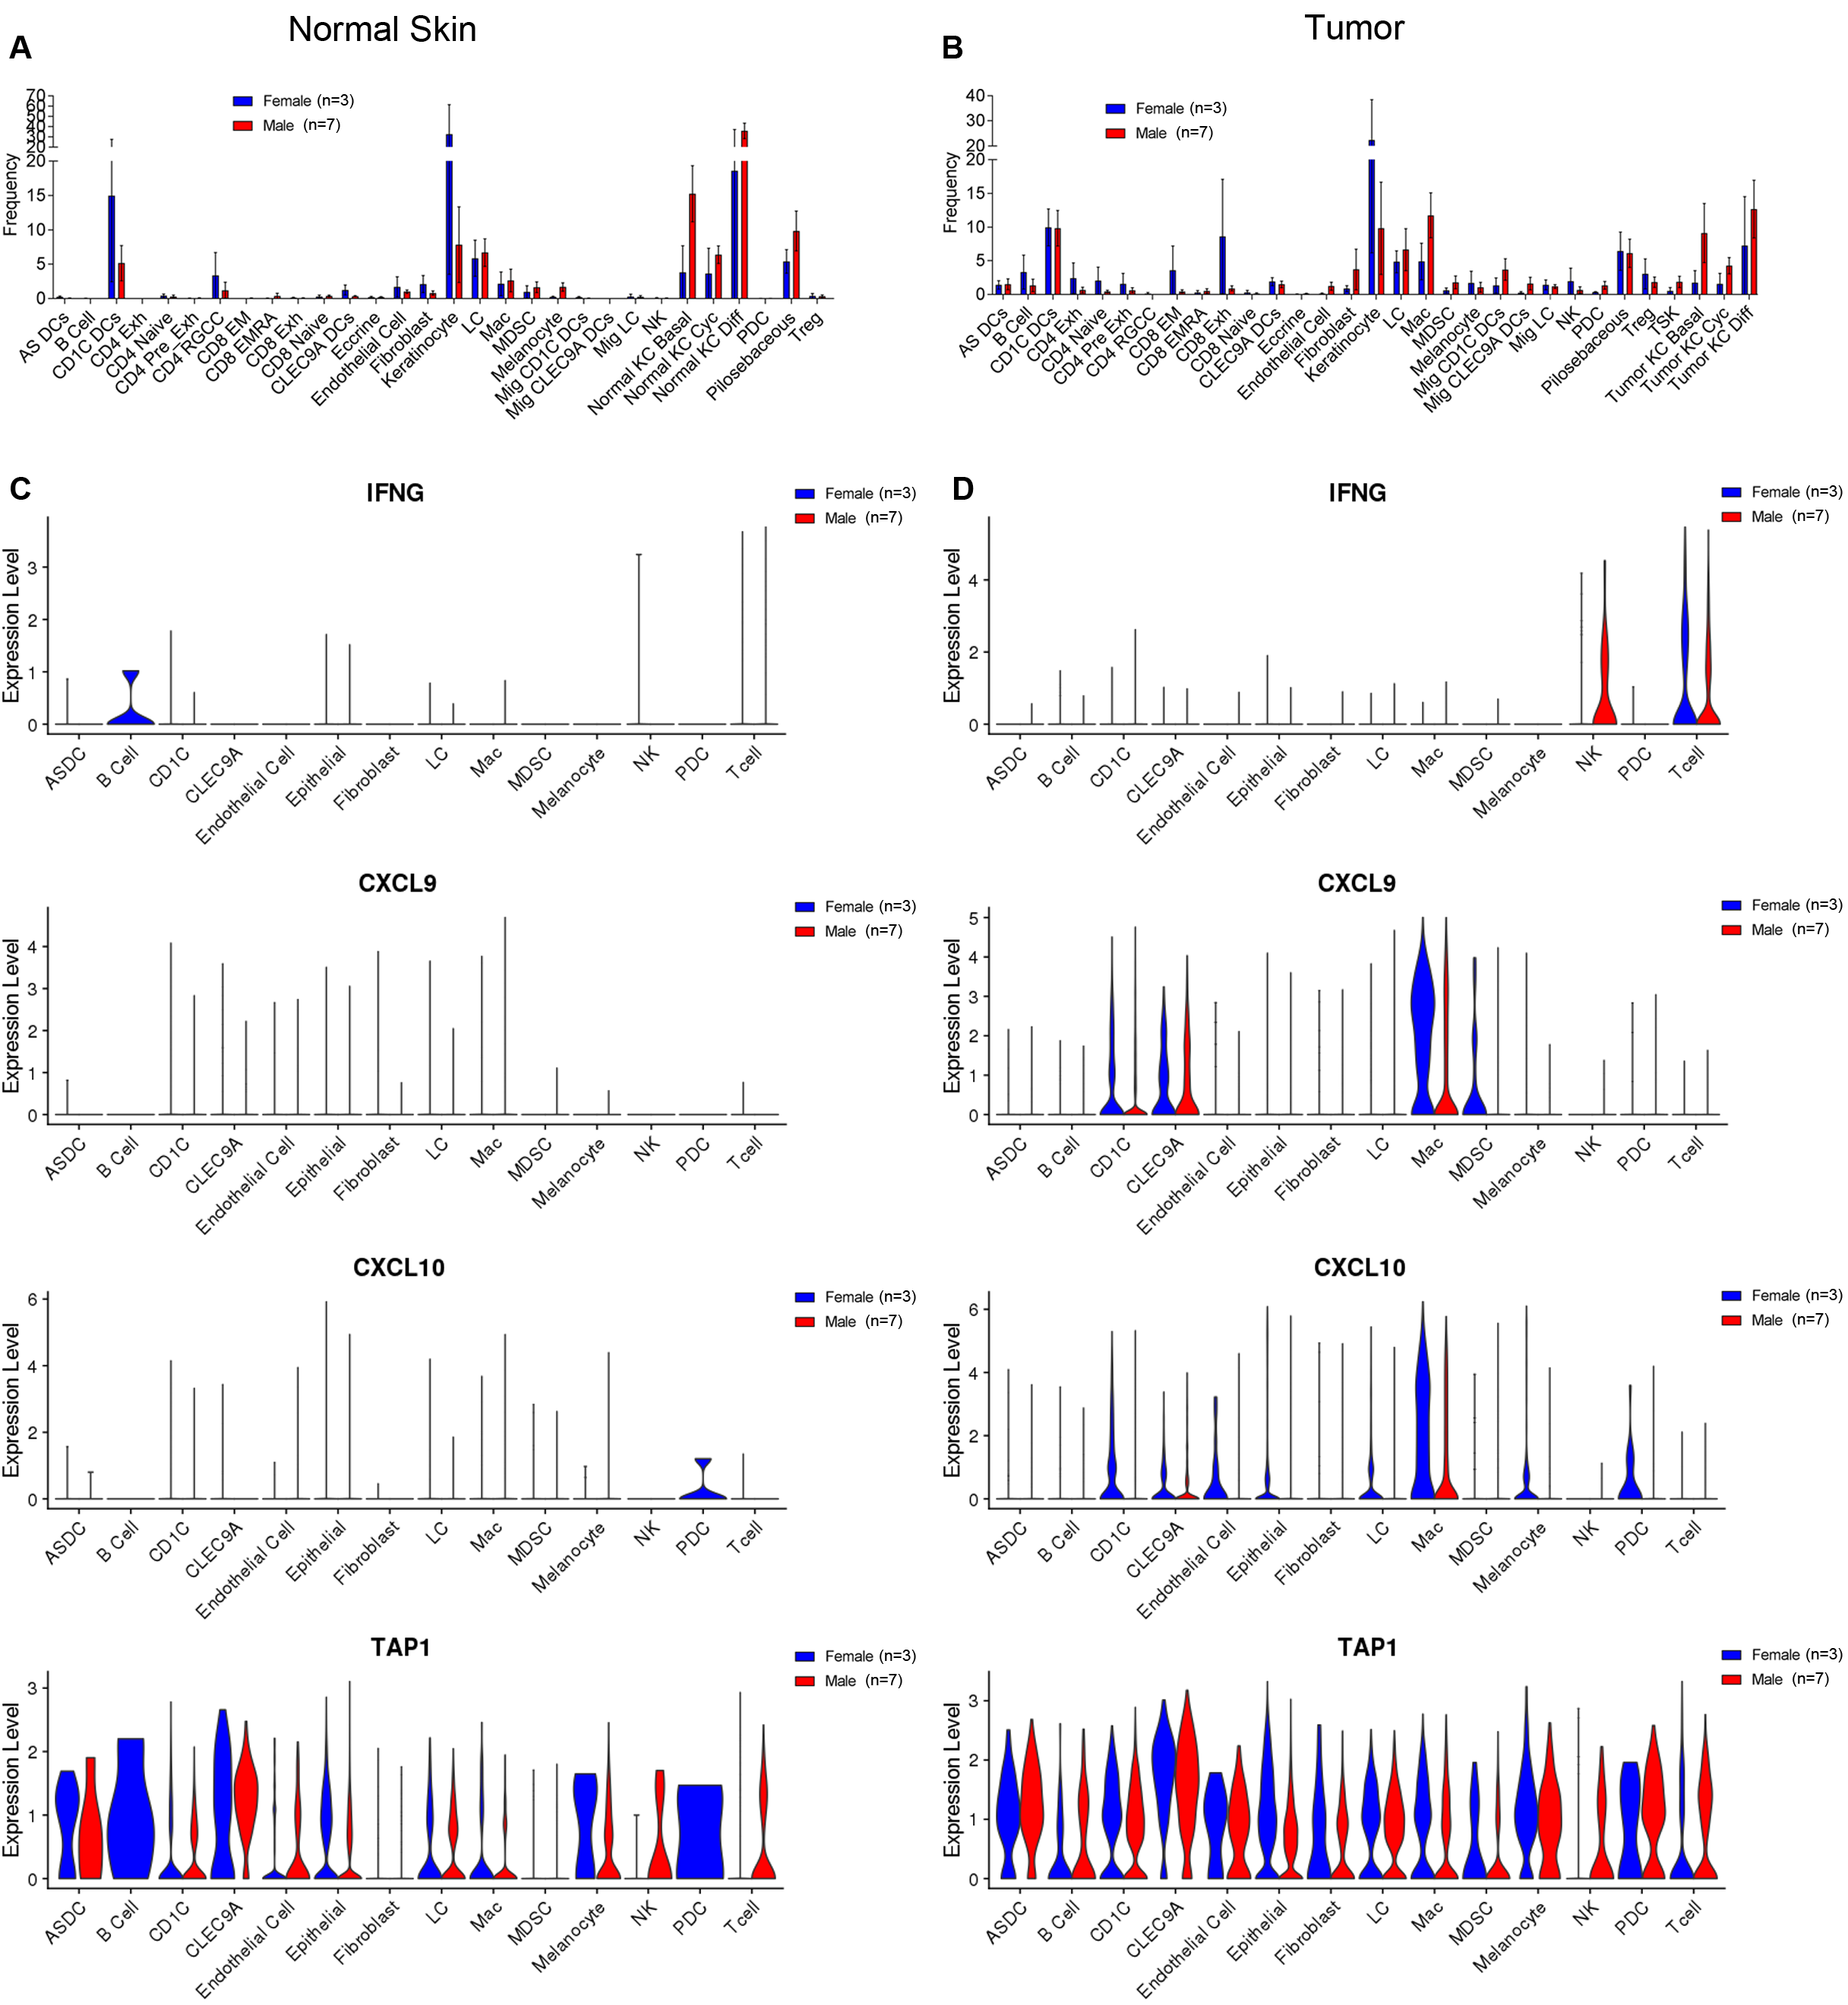


**Supplementary Figure 2.**

(A) Immune cell landscape in human adult UVR-skin and (B) human UVR-cSCC by sex from single cell RNA sequencing data of cSCC tumors and adjacent skin. Data represent cell types as a percent representation of all cells detected within the sample, p values not significant, (n males = 7; females = 3). (C) Expression of immune genes *IFNG*, *CXCL9*, *CXCL10*, and *TAP1* in different cell populations by sex within human UVR-skin and human UVR-cSCC (D).

**Supplementary Tables**

**Supplementary Table 1.** Clinical characteristics of 5 cSCC clinical cohorts by sex, age and immune status.

Supplementary Table **1A:** Primary cSCCs cohort A: Christie NHS Foundation Trust. Cohort B: Salford Royal NHS Foundation Trust. Cohort C: St. George's Hospital NHS Foundation Trust.

Supplementary Table **1B**: Metastatic cSCC to the lymph node, excised at Christie NHS Foundation Trust

Supplementary Table **1C**: Advanced stage cSCC on systemic treatment, treated at La Timoône Aix Marseille University Hospital.

**Supplementary Table 2.** Mutations in tumors and DMBA/TPA treated skin

**Supplementary Table 3.** Differentially expressed genes by sex (A) in normal skin and (B) in DMBA/TPA treated skin.

**Supplementary Table 4.** Histology of primary cSCC and rate of metastasis by sex in *Cdkn2a* wild type and *Cdkn2a* fl/fl male and female mice(2).

**Supplementary Table 5.** Genes differentially expressed by sex in (A) normal tumor- adjacent basal human keratinocytes; (B) in normal tumor-adjacent cycling human keratinocytes; (C) in normal tumor-adjacent differentiated keratinocytes.

**Supplementary Table 6. Clinical data by sex and immune status information in the clinical cohorts.**

Supplementary Table 6A: Clinical data of immunosuppressed patients with primary cSCC in the Salford, Christie and St George's NHS Foundation Trust cohorts

Supplementary Table 6B: Clinical data immunocompetent and immunosuppressed patients with metastatic cSCC to the lymph nodes, Christie NHS Foundation Trust

Supplementary Table 6C: Clinical data in immunocompetent and immunosuppressed patients with advanced stage cSCC, La Timône University Hospitals, Marseille, France

**Supplementary Methods**

**Animal experiments**

All procedures involving animals were performed under the Home Office approved project license P8ADED6C8, and UK Home Office regulations under the Animals (Scientific Procedures) Act 1986. The study received ethical approval by the Cancer Research UK Manchester Institute’s Animal Welfare and Ethics Review Body (AWERB). All mice were maintained in pathogen-free, ventilated cages in the Biological Resources Unit at our Institute, and allowed free access to irradiated food and autoclaved water in a 12 h light/dark cycle, with room temperature at 21 ± 2 °C. All cages contained wood shavings, bedding and a cardboard tube for environmental enrichment.  Experiments were performed in three consecutive cohorts of 4-week-old FVB/N mice acclimatized for 6 days before study (cohort 1: 6 females, 6 males, cohort 2: 7 females, 7 males, cohort 3: 7 females, 7 males). 200 µl DMBA (25mg/ml) 200 µl and TPA (0.02mg/ml) diluted in acetone was applied separately to the shaved backs of mice once a week, two days apart for 6 weeks, followed by TPA only weekly for a further 10 weeks or until first tumors started to develop. In the third cohort, 14 mice were treated with DMBA and TPA on consecutive days over a 10-day period; of these, 8 mice (4 female, 4 male) were given oral prednisolone at 1 mg/kg daily by oral gavage, in addition to DMBA/TPA treatment. Animal tumor development was closely monitored and once tumor development began tumors were counted weekly and classified by size (papule: palpable 1-4mm, papilloma: exophytic, pedunculated lesions of small diameter 2-3.5 mm, tumor: broad-based or endophytic lesions of larger diameter >3.5mm). Animals culled in the first cohort were culled by schedule 1 at 7 weeks following tumor development, or if a single tumor interfered with the quality of life before this point. The second cohort animals were monitored and culled by schedule 1 when tumor volume occupied >50% of the treated area of the back, or a single tumor interfered with the quality of life. The third cohort of animals were culled approximately 48 hours after completion of the last DMBA and TPA treatment. No animals were excluded from the analysis.

**Whole exome sequencing**

DNA was extracted from the largest sized tumor for each mouse along with adjacent treated skin, and a kidney using DNeasy Blood and Tissue Kit (QIAGEN, 69504). Whole exome sequencing was performed by Novogene (Novogene UK). Exome capture was performed with Agilent SureSelect Mouse All Exon Kit and sequenced on the Illumina HiSeq platform. Sequencing reads were trimmed using Trimmomatic(3), aligned to the mm38 reference genome using BWA(4) and duplicate reads were marked using Picard Tools (http://broadinstitute.github.io/picard). Somatic mutations were called using the Varscan 2 pipeline using reads with mapping quality >=20, and tumor and normal coverage >=10(5). Variants within the targeted capture genes were kept for further analysis and were annotated using Variant Effect Predictor(6). Variants present in dbSNP were excluded. Patterns of single nucleotide variation, and insertion and deletions in tumors and skin were analysed using MAFTools in R(7) (version 3.5.1). Oncoplots were generated of the top 20 frequently mutated genes by sex and histology to identify patterns of mutations.

**RNA-seq analysis**

Fresh whole DMBA/TPA treated skin from the back and normal skin from the abdomen were collected and DNA and RNA extracted using a AllPrep DNA/RNA extraction kit (QIAGEN, 80284) and a QIAGEN TissueLyser II. RNA sequencing of paired skin samples from 6 mice (3 females, 3 males) was performed by Novogene (Novogene UK). Paired-end sequencing reads were trimmed with Trimmomatic(3) and aligned to the mouse reference genome (GRCm38) using STAR version 2.7.0a(8). Transcript counts were generated by htseq-count(9) using an Ensembl version 99 gtf (Mus_musculus.GRCm38.99.gtf). Differential gene expression analysis was performed using the DESeq2 package(10) (version 1.22.2) in R (version 3.5.1). To identify sex specific autosomal responses analysis was performed on protein coding genes with the X and Y chromosomes removed from analysis. Reads counts of genes were filtered by removing any gene with less than 10 counts across all samples. Analysis of normal and treated skin between sex was performed independently. For differential expression between sex, data is presented as male expression relative to female. Genes expressed higher in males are represented by positive fold change, and genes higher in females by a negative fold change. For pathway enrichment analysis genes that were significantly differentially expressed between sexes in normal or treated skin (FDR p-value < 0.2) were compared against the Hallmark Database using the Molecular Signatures Database v7.0 (Msigdb, Broad Institute, https://www.gsea-msigdb.org/gsea/msigdb/index.jsp). Immune cell populations were inferred from RNA-seq data using ImmuCC(11).

**Histological mouse sample analysis**

The histological analysis of animals was performed on the four most prominent lesions per mouse, by diameter, blinded for mouse sex. (A.V., L.M.). Tumors were scored as papillomas where the histological features revealed papillary or pedunculated neoplasms of the epithelium with marked acanthosis, papillomatosis and hyperkeratosis surrounding a fibrovascular core, with no evidence of invasion of the dermis. cSCC was defined as a carcinoma of the keratinocytes invading the dermis, and graded: Well differentiated where there was an easily recognizable squamous epithelium, abundant keratinization, apparent intercellular bridges, minimal pleomorphism, and only basally located mitotic figures; Keratoacanthoma when in addition to features of squamous differentiation, the lesion had a marked crateriform appearance limited by squamous lips; Moderately differentiated where only focal keratinization was present and features observed ranged between well and poorly differentiated, with more mitoses across the layers of tumor; and Poorly differentiated where minimal keratinization, marked nuclear atypia, multiple mitoses and scarce squamous differentiation was present. Complete body autopsies were performed, and lymph nodes and organs (except brain) assessed by H&E and pan-keratin stains to confirm metastatic deposits. To measure skin thickness, 10 areas of non-DT exposed and DT exposed skin were examined at 20x, with a Leica Biosystems multiheaded microscope, and superposed layers of epidermis counted. The median number of layers was recorded per site, for n=13 animals. To establish the rate of mitosis, we stained a subset of cSCCs (n =12) and adjacent skin (n =24) with Anti-phospho-Histone H3 (Ser10) (06-570) MilliporeSigma. cSCCs and skin were scored by proportion of positive cells incrementally in 4 categories. To compare the density of infiltrating CD4 and CD8 T cells, we stained cSCCs and adjacent skin with CD4 Antibody ([14-9766-82](tel:14-9766-82)) ThermoFisher / eBioscience and CD8a Antibody ([14-0808-82](tel:14-0808-82))  ThermoFisher / eBioscience.The samples were scored in 5 incremental categories. For the inflammatory infiltration in the DMBA/TPA +/- prednisolone cohorts, scores were obtained across n=15 fields of skin per condition x100 magnification.

**Clinical human sample analysis**

Age, sex, immune status and histological grade of human primary cutaneous squamous cell carcinoma were audited from 3 UK NHS hospitals: A: the Christie NHS Foundation Trust, Manchester B: Salford Royal NHS Foundation Trust, Manchester and C: St George’s NHS Foundation Trust, London. Samples from immune-competent and immune-suppressed patients were identified from consecutive, routine pathology reports coded for excised cSCC in a period of 18 months at A and B. An additional search for cSCC from immune-suppressed cSCC was performed by identifying patients in clinical lists of organ transplant recipients/ immunosuppressed patient skin cancer clinics seen at B. Samples from immunocompetent and suppressed patients from C were identified from consecutive multidisciplinary team meetings and from consecutive dermatology-led organ transplant skin cancer clinics. Bowen’s, in situ and rare histological variants of cSCC (SCC with osteoclast‐like giant cells, with sarcomatoid differentiation, pseudovascular/ pseudoangiomatoid SCC, lymphoepithelioma‐like SCC, adenosquamous SCC, purely spindle‐cell, acantholytic, clear-cell SCCs and epithelioma cuniculatum) were excluded from the audit. Samples were graded by NHS pathologists under routine diagnostic practice according to increasing degrees of histologically aggressive features: keratoacanthoma (KA)/ well differentiated invasive SCC (1), moderately differentiated SCC (2) and poorly differentiated SCC (3). Occasionally, the pathology report stated tumors depicted two distinct areas of differentiation (well-to-moderately differentiated, moderate-to-poorly differentiated), which we graded intermediately. The immune status of patients is not routinely available in the pathology report and was retrieved from clinical histories. The collection of clinical variables at Salford Royal was done under IRAS approval: 216310, REC reference: 16/LO/2098 within a larger skin cancer study. The collection of data at Christie and St.George’s was approved as an audit on histological grade of cSCC, sex and treatment.

The fourth clinical cohort of metastatic cSCC to the lymph nodes was obtained by collecting all consecutive cSCC metastatic to the lymph node cases from 2012-2017, recording age, sex and immune status, treated by surgical excision at the Christie NHS Foundation Trust, Manchester, identified from the pathology database searching for lymph node metastasis of primary cutaneous squamous cell carcinoma.

The fifth cohort of advanced cSCC cases treated at a single institution with systemic agents for advanced stage cSCC was collected from La Timône Aix Marseille University Hospital Marseille, France. This included patients treated with systemic medication for: inoperable metastatic cSCC, locally advanced, radioresistant cSCC. Patients received cetuximab, pembrolizumab, cemiplimab, convential chemotherapy or palliative care, from 12/ 2017 -12/ 2020. The information was collected as part of a clinical audit approved by tumour board local, national regulations, with patient written consent, by Comite de Protection des Personnes Sud Méditerranée and Aix-Marseile University Hospital approval.

The immune status was investigated for all patients, and immunosuppressed patients held the following concurrent diagnoses primarily: organ transplant recipients on immunosuppressive medication, white blood cell dyscrasia or systemic cancer treatment with immunotherapy, radiotherapy or chemotherapy in the past 10 years, chronic inflammatory disorders and autoimmune disorders on systemic immunosuppressive medication, and is detailed in Supplementary Table 6.

**Data Analysis**

Statistical analysis was performed using GraphPad Prism (Version 7.01). Mann-Whitney U test was used to compare significant difference between groups. Fisher exact test used to identify significant association between categorical variables sex and tumor histology. To compare the observed proportion of men versus women in the clinical cohorts to a theoretical expected 50:50 ratio we used one-proportion Z-tests. Individual data points are displayed in all violin plots where n<50. Human single cell RNA-seq data from a study of squamous cell carcinoma(1) was downloaded from GEO database (GSE144236) and analysed in the Seurat R package(12) following standard pipeline and authors analyses. This study sequenced individual cells in human cSCCs and adjacent normal UVR-skin. Cell types are identified by the expression of marker genes that are restricted to specific cell types. Cell populations were measured as a percent representation of all cells detected within the sample. Differential expression in the normal tumor-adjacent keratinocytes between sex (female n=3, males n=6) was performed with the FindMarkers function after subsetting samples for normal keratinocytes. Pathway analysis was performed as described above.

**References (Methods)**

1. Ji AL, Rubin AJ, Thrane K, Jiang S, Reynolds DL, Meyers RM, et al. Multimodal Analysis of Composition and Spatial Architecture in Human Squamous Cell Carcinoma. Cell. 2020;182:497-514.e22.

2. Li Z, Gonzalez CL, Wang B, Zhang Y, Mejia O, Katsonis P, et al. Cdkn2a suppresses metastasis in squamous cell carcinomas induced by the gain-of-function mutant p53(R172H). J Pathol. England; 2016;240:224–34.

3. Bolger AM, Lohse M, Usadel B. Trimmomatic: a flexible trimmer for Illumina sequence data. Bioinformatics. 2014;30:2114–20.

4. Li H, Durbin R. Fast and accurate short read alignment with Burrows-Wheeler transform. Bioinformatics [Internet]. 2009;25:1754–60. Available from: http://www.ncbi.nlm.nih.gov/pubmed/19451168

5. Koboldt DC, Zhang Q, Larson DE, Shen D, McLellan MD, Lin L, et al. VarScan 2: somatic mutation and copy number alteration discovery in cancer by exome sequencing. Genome Res [Internet]. 2012;22:568–76. Available from: http://www.ncbi.nlm.nih.gov/pubmed/22300766

6. McLaren W, Pritchard B, Rios D, Chen Y, Flicek P, Cunningham F. Deriving the consequences of genomic variants with the Ensembl API and SNP Effect Predictor. Bioinformatics. 2010;26:2069–70.

7. Mayakonda A, Lin D-C, Assenov Y, Plass C, Koeffler HP. Maftools: efficient and comprehensive analysis of somatic variants in cancer. Genome Res [Internet]. 2018 [cited 2018 Dec 13];28:1747–56. Available from: http://genome.cshlp.org/lookup/doi/10.1101/gr.239244.118

8. Dobin A, Davis CA, Schlesinger F, Drenkow J, Zaleski C, Jha S, et al. STAR: ultrafast universal RNA-seq aligner. Bioinformatics. 2013;29:15–21.

9. Anders S, Pyl PT, Huber W. HTSeq--a Python framework to work with high-throughput sequencing data. Bioinformatics. 2015;31:166–9.

10. Love MI, Huber W, Anders S. Moderated estimation of fold change and dispersion for RNA-seq data with DESeq2. Genome Biol. 2014;15:550.

11. Chen Z, Quan L, Huang A, Zhao Q, Yuan Y, Yuan X, et al. seq-ImmuCC: Cell-Centric View of Tissue Transcriptome Measuring Cellular Compositions of Immune Microenvironment From Mouse RNA-Seq Data. Front Immunol. 2018;9:1286.

12. Butler A, Hoffman P, Smibert P, Papalexi E, Satija R. Integrating single-cell transcriptomic data across different conditions, technologies, and species. Nat Biotechnol. 2018;36:411–20.
